# Supplementary material for: Co-Encapsulation of Simvastatin and Doxorubicin into pH-Sensitive Liposomes Enhances Antitumoral Activity in Breast Cancer Cell Lines
Source: MDPI journal article supplement (doi:10.3390/pharmaceutics15020369), 2023-01-21
Supplement: s1 [file s1]

# Supplementary Materials: Co-Encapsulation of Simvastatin and Doxorubicin into pH-Sensitive Liposomes Enhances Antitumoral Activity in Breast Cancer Cell Lines

Jaqueline Aparecida Duarte, Eliza Rocha Gomes, Andre Luis Branco de Barros and Elaine Amaral Leite

**Table S1.** Physicochemical characteristics for the different formulations.

| Molar ratio<br>SpHL-D-S | Mean diameter<br>(nm) | PDI         | Zeta potential (mV) | Encapsulated drug concentration (mg/mL) |               |
|-------------------------|-----------------------|-------------|---------------------|-----------------------------------------|---------------|
|                         |                       |             |                     | [DOX] (mg/mL)                           | [SIM] (mg/mL) |
| 1:1                     | 139 ± 2.6             | 0.22 ± 0.03 | −3.39 ± 0.28        | 0.93 ± 0.06                             | 0.72 ± 0.05   |
| 1:2                     | 140 ± 1.3             | 0.19 ± 0.02 | −3.56 ± 0.55        | 0.50 ± 0.07                             | 0.76 ± 0.04   |
| 2:1                     | 136 ± 6.9             | 0.21 ± 0.04 | −3.68 ± 0.76        | 1.97 ± 0.11                             | 0.77 ± 0.10   |

Data are expressed as mean ± standard deviation (SD). n = 3.

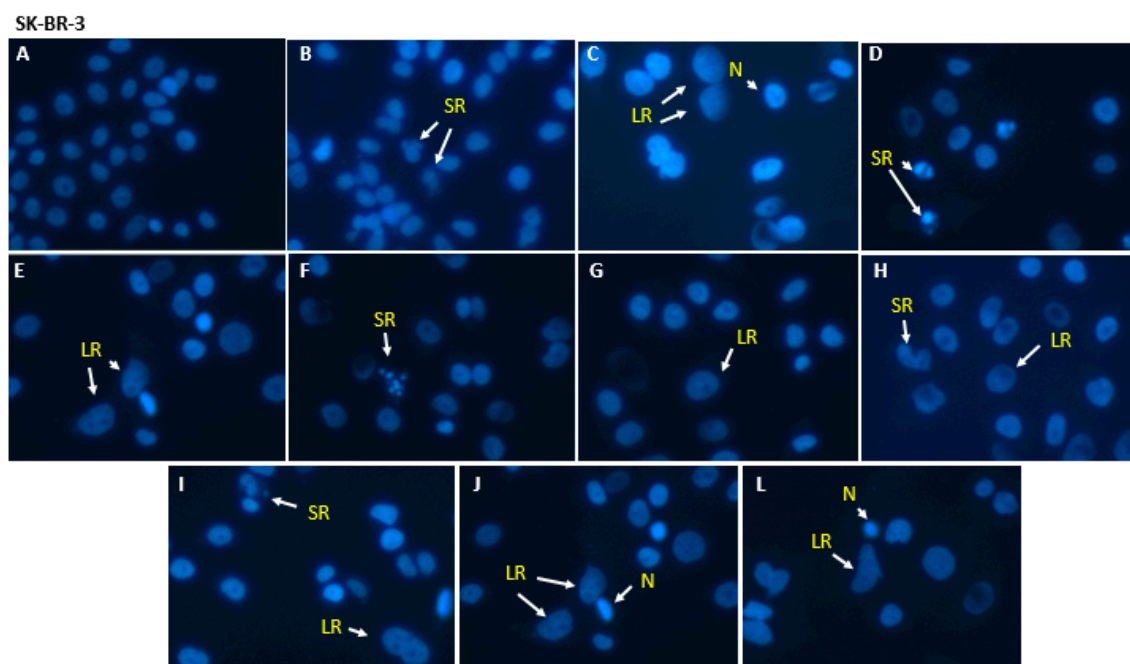

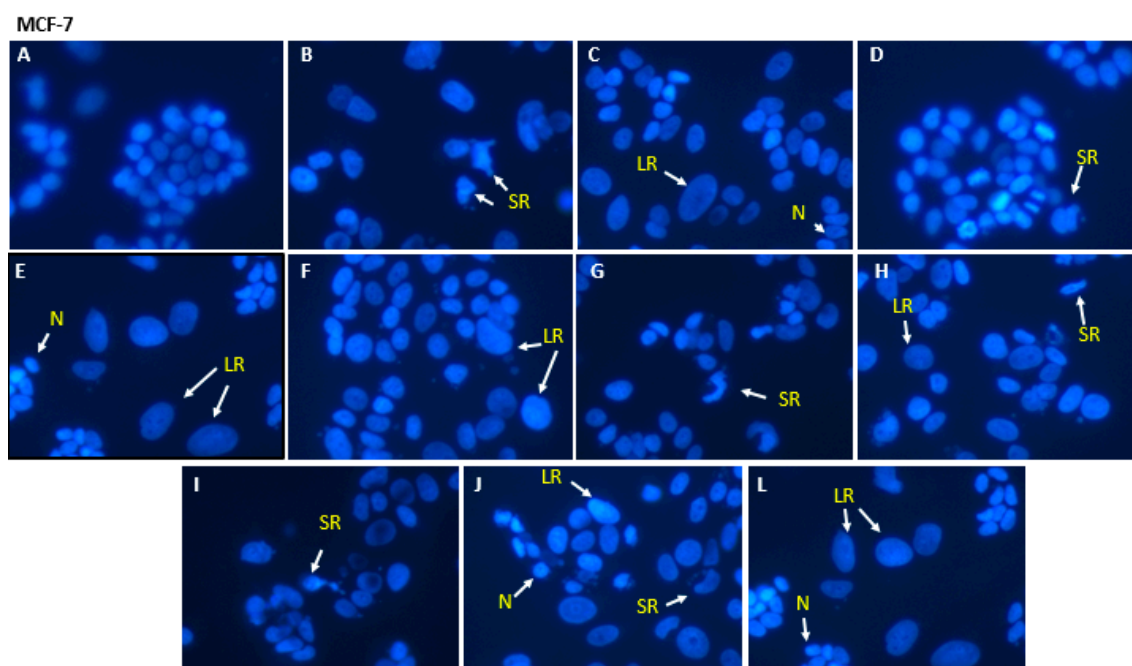

**Figure S1.** Representative fluorescence photomicrographs of breast cancer cell nuclei stained with Hoechst 33342 after treatments at a concentration of 80 nM, for 48 h: SpHL (A); free DOX (B); SIM free (C); DOX:SIM 1:1 (D); DOX:SIM 1:2 (E); DOX:SIM 2:1 (F) SpHL-D (G); SpHL-S (H); SpHL-D-S 1:1 (I); SpH-D-S 1:2 (J) or SpHL-D-S 2:1 (L).
